# Supplementary material for: Iron-doped ZnO as a support for Pt-based catalysts to improve activity and stability: enhancement of metal–support interaction by the doping effect
Source: Royal Society of Chemistry journal article supplement (doi:10.1039/c8ra03664k), 2018-01-01
Supplement: c8ra03664k1.pdf [file c8ra03664k1.pdf]

## Electronic Supplemental Information (ESI)

# **Iron-doped ZnO as Support for Pt-based Catalysts to Improve Activity and Stability: Enhancement of Metal–Support Interaction by the Doping Effect**

Si Bui Trung Tran<sup>a</sup>, Han Seul Choi<sup>a,b</sup>, Sun Young Oh<sup>a,b</sup>, Song Yi Moon<sup>a,b</sup>, Jeong Young Park<sup>\*,a,b</sup>

<sup>a</sup> Center for Nanomaterials and Chemical Reactions, Institute of Basic Science (IBS), Daejeon 305-701, Republic of Korea

<sup>b</sup> Graduate School of EEWS and Department of Chemistry, Korea Advanced Institute of Science and Technology (KAIST), Daejeon 305-701, Republic of Korea

\* E-mail: [jeongypark@kaist.ac.kr](mailto:jeongypark@kaist.ac.kr)

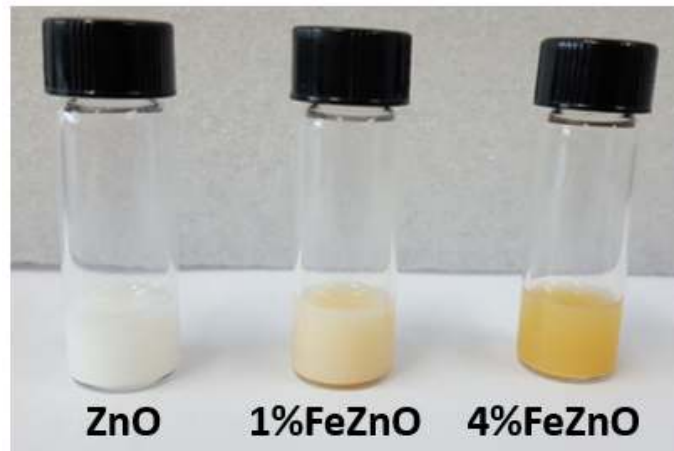

**Fig. S1** Photograph of the samples.

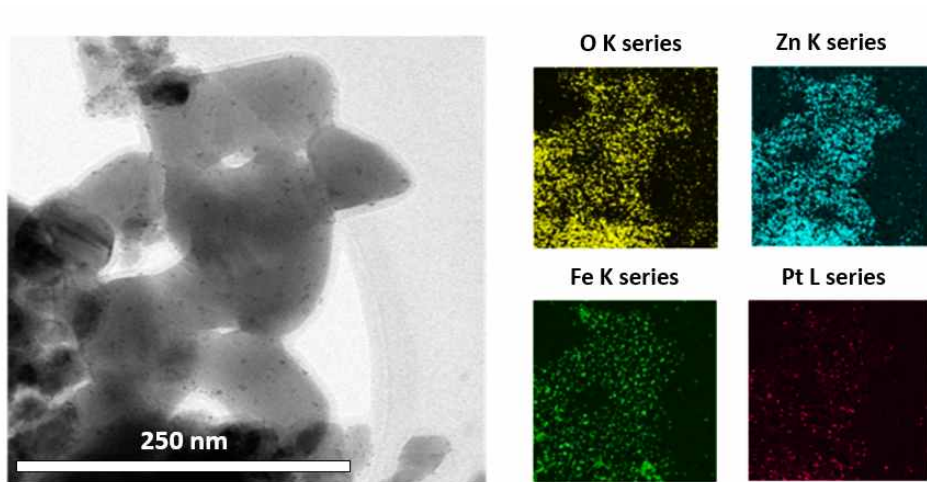

**Fig. S2** (left) SEM image and (right) corresponding EDS mapping of the Pt/4%FeZnO sample.

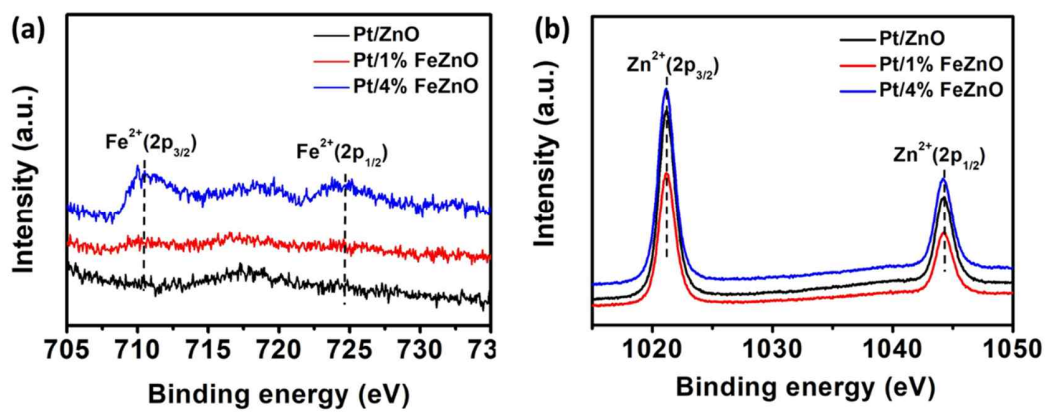

**Fig. S3** XPS spectra of (a) Fe 2p and (b) Zn 2p core levels for the catalysts Pt/ZnO, Pt/1%FeZnO, and Pt/4%FeZnO.

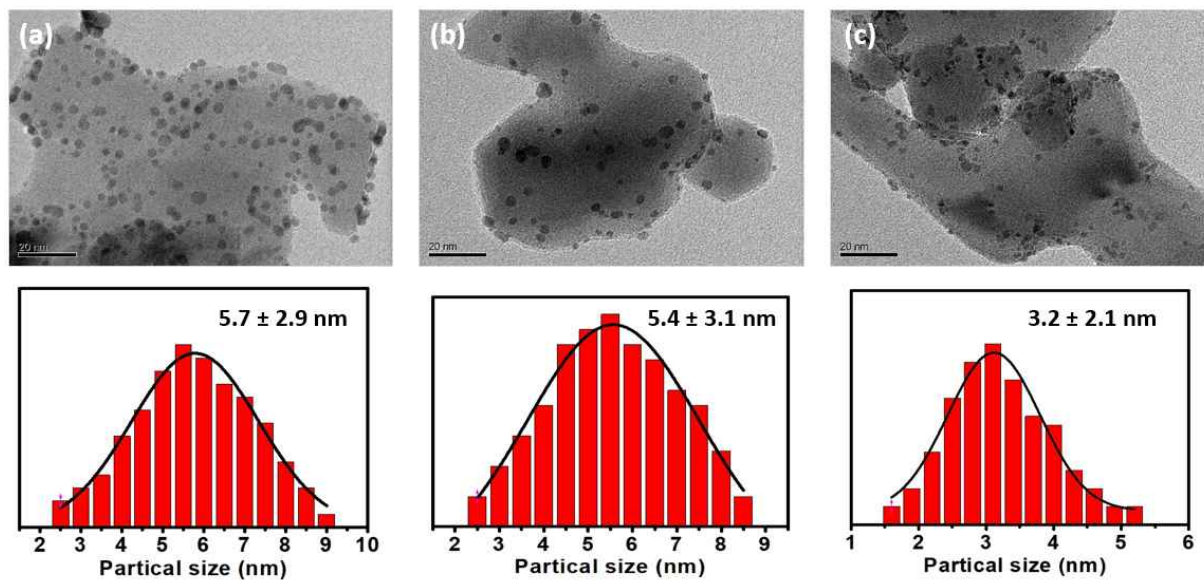

**Fig. S4** TEM images of the (a) Pt/ZnO, (b) Pt/1%FeZnO, and (c) Pt/4%FeZnO samples collected after the CO oxidation reaction and their corresponding particle size distributions
